# Supplementary material
Source: publisher figshare collection journal article supplement (https://gsajournals.figshare.com/ndownloader/files/12978500)
Supplement: Supplementary file 1 [file 12978500]

## Sheet: ReadMe
Sheet	Information
lin41_gRNAs	Guide RNAs used in CRISPR-Cas9 genome editing to generate lin-41 alleles
lin41_alleles	Details of construction of the lin-41 alleles described in this work
PCR primers	PCR primers used in screening for CRISPR-Cas9 genome editing events
GFP_LIN41_proteins	Description of the mutant LIN-41 proteins generated by CRISPR-Cas9 genome editing described in this study
oma2_alleles	Novel oma-2 alleles generated using CRISR-Cas9 genome editing in this study

## Sheet: lin41_gRNAs
Name	Plasmid name (sgRNA in pRB1017)	Identified 20-nt gRNA	Transcribed gRNA	gRNA homology to lin-41	PAM site	Strand	Estimated efficiency (#F1s with lin-41(lf) progeny/total)	Estimated efficiency (%)	Cut site location
lin41_gRNA_2	pCS480	TCTGGATCGTCCCACTGATT	GCTGGATCGTCCCACTGATT	CTGGATCGTCCCACTGATT	NGG	Sense	7/572	1.2	Exon 15, in the last NHL repeat (near tn1487)
lin41_gRNA_6*	pCS492	GGTCCAACTGCCAAATCAGT	GGTCCAACTGCCAAATCAGT	GGTCCAACTGCCAAATCAGT	NGG	Antisense	< 15/112*	< 13.4*	Exon 15, in the last NHL repeat
lin41_gRNA_7*	pCS494	GATTTGGCAGTTGGACCTGA	GATTTGGCAGTTGGACCTGA	GATTTGGCAGTTGGACCTGA	NGG	Sense	< 15/112*	< 13.4*	Exon 15, in the last NHL repeat
lin41_gRNA_9	pCS498	AGTGAGAATGAGAATGCACG	GGTGAGAATGAGAATGCACG	GTGAGAATGAGAATGCACG	NGG	Antisense	17/100	17	Exon 5, after the RING domain but before Bbox #1
lin41_gRNA_10	pCS500	TGTTGTGGCTGAGATCCAAG	GGTTGTGGCTGAGATCCAAG	GTTGTGGCTGAGATCCAAG	NGG	Antisense	23/103	22.3	Exon 6, just before Bbox #1
lin41_gRNA_11	pCS502	ACAACAATGGATATTCGACG	GCAACAATGGATATTCGACG	CAACAATGGATATTCGACG	NGG	Sense	27/110	24.5	Exon 13, before NHL #1 near the end of the Ig/Filamin domain
lin41_gRNA_14	pCS514	GGAAACGAGCTGTCGATGGG	GGAAACGAGCTGTCGATGGG	GGAAACGAGCTGTCGATGGG	NGG	Sense	31/100	31	Exon 1
lin41_gRNA_16	pCS524	CTGCGATGTAAAGTTGGCGG	GTGCGATGTAAAGTTGGCGG	TGCGATGTAAAGTTGGCGG	NGG	Antisense	16/103	15.5	Exon 4, just after the RING domain
lin41_gRNA_17	pCS525	GGTGACTGAATCATTGACGG	GGTGACTGAATCATTGACGG	GGTGACTGAATCATTGACGG	NGG	Antisense	22/103	21.4	Exon 2
lin41_gRNA_18	pCS526	GGAGCAGACTGAGCACCGAA	GGAGCAGACTGAGCACCGAA	GGAGCAGACTGAGCACCGAA	NGG	Antisense	18/99	18.2	Exon 2, near the beginning of the RING domain
lin41_gRNA_19	pCS527	AGAGCTCCACGTGGCGGTGA	GGAGCTCCACGTGGCGGTGA	GAGCTCCACGTGGCGGTGA	NGG	Antisense	15/108	13.9	Exon 4, near a strong CDK1 consensus sequence (SPPR)
lin41_gRNA_22	pCS531	GTGAATGCTCACCGCGATGG	GTGAATGCTCACCGCGATGG	GTGAATGCTCACCGCGATGG	NGG	Antisense	7/114	6.1	Exon 2
lin41_gRNA_29	pCS555	GGTGTTGCCAATTGAAGACG	GGTGTTGCCAATTGAAGACG	GGTGTTGCCAATTGAAGACG	NGG	Antisense	22/125	17.6	Exon 6, near a strong CPD consensus sequence (LATPMSS)
* gRNA_6 and gRNA_7 were tested and used together

## Sheet: lin41_alleles
Allele	gRNA_a	gRNA_b	gRNA_c	ssODN repair template name	ssODN repair template (bases flanking a deletion, synonymous change, non-synonymous change, screening restriction site)	Mutant sequence (bases flanking a deletion, insertion, synonymous change, non-synonymous change, screening restriction site)	Comment(s)	PCR primer #1	PCR primer #2	Restriction Digest	lin-41(tn1541) or wild-type PCR product size(s) after digest	Mutant PCR product size(s) after digest	Duplicate Allele(s)	Related allele(s)
lin-41(tn1541tn1548)	lin41_gRNA_2			tn1487_PvuI	GCTCCAACTCCACTGACTCCTTCACCACGTCAGCTTCTCGATCGTCCCACTAATCTTGCAGTTGGACCTGATGGTCGCATATACGTCGTTGATTTCGGAAACAAT	GCTCCAACTCCACTGACTCCTTCACCACGTCAGCTTCTCGATCGTCCCACTAATCTTGCAGTTGGACCTGATGGTCGCATATACGTCGTTGATTTCGGAAACAAT	lin-41(tn1541tn1548) is a perfect match to the repair ssODN	tn1487.F	Cdel1.R	PvuI	455 bp	262, 198 bp	lin-41(tn1541tn1547), lin-41(tn1541tn1549)	None
lin-41(tn1541tn1562)	lin41_gRNA_10					CACCAATGTCTTCACAATCACAGCAAACTTTTCCAATTCCTTCACCACTTTTGTCACCACTTTTGTCaccactttttgtcgcaattcgaaattaatttttgtattttttttcaaaat	Identified as a randomly-generated GFP+ lin-41(lf) deletion allele.	6F	4R	NONE	5.1 kb	2.4 kb	None	None
lin-41(tn1541tn1571)	lin41_gRNA_11					CATGTCAGGTGAATGAAGACGATCGACTCAAATTCACAGCTCCACAGGATGAGATTGCAGCAAAAGGGCCAATTCTGACATTCGGAAAAGAAGGATCCGG	Identified as a randomly-generated GFP+ lin-41(lf) deletion allele.	Cdel1.F	Cdel1.R	NONE	3.0 kb	2.2 kb	None	None
lin-41(tn1541tn1618)	lin41_gRNA_11	lin41_gRNA_7	lin41_gRNA_6	Exon_13_15_fusion	CACTGAATATTCTTGTCAAAGGAACTCCAATCAGTGGATGCCCGACAACAATGGATATTCGAGGACCAGATGGTCGCATATACGTCGTTGATTTCGGAAACAATTGCATCCGTGTCTTCTAGacac	CACTGAATATTCTTGTCAAAGGAACTCCAATCAGTGGATGCCCGACAACAATGGATATTCGAGGACCAGATGGTCGCATATACGTCGTTGATTTCGGAAACAATTGCATCCGTGTCTTCTAGacac	The synonymous change in the ssODN is not present in lin-41(tn1541 tn1618).	10F	4R	NONE	1.9 kb	0.9 kb	None	lin-41(tn1541tn1619) is a deletion/insertion allele. It has the targeted 1023 bp deletion and silent base-pair substitution but also has a 54-bp (18 aa) insertion. GFP::LIN-41 is punctate in this strain, similar to lin-41(tn1541tn1618).
lin-41(tn1541tn1620)	lin41_gRNA_14	lin41_gRNA_9		Exon_1_5_fusion	CTCGTCGGCTTCAAACTGAGATCGACGTGGACGCCAACGACAGCGGAAACGAGCTGTCGATGGCATTCTCATTCTCACTCAGTGGAATGCCTGGATCACCGTCTCCAGTGATGGGTGCACGGATG	CTCGTCGGCTTCAAACTGAGATCGACGTGGACGCCAACGACAGCGGAAACGAGCTGTCGATGGCATTCTCATTCTCACTCAGTGGAATGCCTGGATCACCGTCTCCAGTGATGGGTGCACGGATG	lin-41(tn1541tn1620) is a perfect match to the repair ssODN.	GFP7215	6R	NONE	1.8 kb, will only amplify from lin-41(tn1541)	1.1 kb	lin-41(tn1541tn1621)	None
lin-41(tn1541tn1622)	lin41_gRNA_9	lin-41_gRNA_10		Exon_5_6_fusion	ctcaatttacaccgaagaataacccaaattccagCATCAACTCCACTTCATCAACCTCGAGGATCACAACCACAACAACAACAGCCAATGGGTCCGATTCAATGTCAAGGATGCGAATCGAAAATgttag	ctcaatttacaccgaagaataacccaaattccagCATCAACTCCACTTCATCAACCTCGAGGATCACAACCACAACAACAACAGCCAATGGGTCCGATTCAATGTCAAGGATGCGAATCGAAAATgttag	lin-41(tn1541tn1622) is a perfect match to the repair ssODN.	GFP7215	exon7.R	NONE	2.1 kb, will only amplify from lin-41(tn1541)	1.3 kb	None	None
lin-41(tn1541tn1628)	lin41_gRNA_10	lin41_gRNA_7	lin41_gRNA_6	Exon_6_15_fusion	CAATTGGCAACACCAATGTCTTCACAATCACAGCAAACTTTTCCAATTCCTTCACCACTTGGACCAGATGGTCGCATATACGTCGTTGATTTCGGAAACAATTGCATCCGTGTCTTCTAGacac	CAATTGGCAACACCAATGTCTTCACAATCACAGCAAACTTTTCCAATTCCTTCACCACTTGGACCAGATGGTCGCATATACGTCGTTGATTTCGGAAACAATTGCATCCGTGTCTTCTAGacac	lin-41(tn1541tn1628) is a perfect match to the repair ssODN.	6F	4R	NONE	5.1 kb	0.9 kb	lin-41(tn1541tn1629)	None
lin-41(tn1541tn1630)	lin41_gRNA_18	lin41_gRNA_16		lin41_RING_del	CAGCAACCACAGTTCCAGTTCAACACTGGATTCGGACTCGGACTCCCGCAAGACTCCTTTGCCAACTTTACATCGCAGATGTACCTGTCTCCGACGCTTCCATCACCGCCACGTGGAGCT	CAGCAACCACAGTTCCAGTTCAACACTGGATTCGGACTCGGACTCCCGCAAGACTCCTTTGCCAACTTTACATCGCAGATGTACCTGTCTCCGACGCTTCCATCACCGCCACGTGGAGCT	lin-41(tn1541tn1630) is a perfect match to the repair ssODN.	RING.F	n2914.R	NONE	480 bp	247 bp	lin-41(tn1541tn1631)	None
lin-41(tn1541tn1635)	lin41_gRNA_16	lin41_gRNA_9		Exon_4_5_fusion	gatttatgaattttagCTTGCAAGCTGTGTGGTGCCGTATCGACAGCCACCGCATTCTCATTCTCACTCAGTGGAATGCCTGGATCACCGTCTCCAGTGATGG	gatttatgaattttagCTTGCAAGCTGTGTGGTGCCGTATCGACAGCCACCGCATTCTCATTCTCACTCAGTGGAATGCCTGGATCACCGTCTCCAGTGATGG	lin-41(tn1541tn1635) is a perfect match to the repair ssODN.	n2914.F	exon5.R	NONE	474 bp	294 bp	lin-41(tn1541tn1634)	None
lin-41(tn1541tn1638)	lin41_gRNA_14	lin41_gRNA_18		Exon_1_2_fusion	CTTCAAACTGAGATCGACGTGGACGCCAACGACAGCGGAAACGAGCTGTCGATGCGGTGCTCAGTCTGCTCCAAGAGCTCGACGATTGGAGTGCTGCCGTTCGTTTG	CTTCAAACTGAGATCGACGTGGACGCCAACGACAGCGGAAACGAGCTGTCGATGCGGTGCTCAGTCTGCTCCAAGAGCTCGACGATTGGAGTGCTGCCGTTCGTTTG	lin-41(tn1541tn1638) is a perfect match to the repair ssODN.	exon1seq.F	n2914.R	NONE	688 bp	579 bp	lin-41(tn1541tn1639)	lin-41(tn1541tn1640) is a GFP+ 284-bp in-frame deletion that is slightly larger than lin-41(tn1541tn1638); it ends in exon 2, but extends slightly into the region encoding the RING finger. In lin-41(tn1541tn1640) mutants, GFP::LIN-41 is not eliminated from early embryos .
lin-41(tn1541tn1641)	lin41_gRNA_19			Exon_4_APPR	ACCGCCAACTTTACATCGCAGATGTACCTGTCTCCGACGCTTCCAGCTCCACCTCGAGGAGCACTGATGTCGGATTGTTCGACACCAACGATGAATAATCACATTAAT	ACCGCCAACTTTACATCGCAGATGTACCTGTCTCCGACGCTTCCAGCTCCACCTCGAGGAGCACTGATGTCGGATTGTTCGACACCAACGATGAATAATCACATTAAT	lin-41(tn1541tn1641) is a perfect match to the repair ssODN.	exon1seq.F	exon5.R	XhoI	845 bp	666, 179 bp	None	lin-41(tn1541tn1642) has the non-synonymous changes found in lin-41(tn1541tn1641) (S176A), but only the first 3 (of 4) synonymous changes. In lin-41(tn1541tn1642) mutants, GFP::LIN-41 is eliminated normally from early embryos.
lin-41(tn1541tn1643)	lin41_gRNA_14	lin41_gRNA_10		Exon_1_6_fusion	CTCGTCGGCTTCAAACTGAGATCGACGTGGACGCCAACGACAGCGGAAACGAGCTGTCGATGGGATCTCAGCCACAACAACAACAGCCAATGGGTCCGATTCAATGTCAAGGATGCGAATCGAAA	CTCGTCGGCTTCAAACTGAGATCGACGTGGACGCCAACGACAGCGGAAACGAGCTGTCGATGGGATCTCAGCCACAACAACAACAGCCAATGGGTCCGATTCAATGTCAAGGATGCGAATCGAAA	lin-41(tn1541tn1643) is a perfect match to the repair ssODN.	GFP7215	exon7.R	NONE	2.1 kb, will only amplify from lin-41(tn1541)	598 bp	lin-41(tn1541tn1644)	None
lin-41(tn1541tn1645)	lin41_gRNA_17			lin41_exon2_FDAPPS	CATCTTGGCTCGGGACCACCACCACCACAGTTCACTGGCTCACTATTTGACGCTCCGCCATCGATGATCCAATCACCACAGCAGCAACCACAGTTCCAGTTCAACACTGGATTCGGACTCGG	CATCTTGGCTCGGGACCACCACCACCACAGTTCACTGGCTCACTATTTGACGCTCCGCCATCGATGATCCAATCACCACAGCAGCAACCACAGTTCCAGTTCAACACTGGATTCGGACTCGG	lin-41(tn1541tn1645) is a perfect match to the repair ssODN.	exon1seq.F	exon5.R	ClaI	845 bp	542, 303 bp	None	lin-41(tn1541tn1646) has the non-synonymous change found in lin-41(tn1541tn1645) (T83A), but only the first 3 (of 5) synonymous changes. In lin-41(tn1541tn1646) mutants, GFP::LIN-41 is not eliminated from early embryos. lin-41(tn1541tn1647) has the first 3 (of 5) synonymous changes, but NO non-synonymous changes and GFP::LIN-41 is eliminated normally from early embryos.
lin-41(tn1541tn1661)	lin41_gRNA_17			lin41_exon2_QAPQQ	CATCTTGGCTCGGGACCACCACCACCACAGTTCACTGGCTCACTATTTGACACTCCGCCATCGATGATCCAAGCTCCACAGCAGCAACCACAGTTCCAGTTCAACACTGGATTCGGACTCGG	CATCTTGGCTCGGGACCACCACCACCACAGTTCACTGGCTCACTATTTGACACTCCGCCATCGATGATCCAAGCTCCACAGCAGCAACCACAGTTCCAGTTCAACACTGGATTCGGACTCGG	lin-41(tn1541tn1661) is a perfect match to the repair ssODN.	exon1seq.F	exon5.R	ClaI	845 bp	542, 303 bp	lin-41(tn1541tn1662)	None
lin-41(tn1541tn1663)	lin41_gRNA_22			lin41_exon2_HAPNHH	aattgaaaaaaaagcttccaacgaaacaacttcagGTGACTCAATGTCCCATCACAGAGGTGAGCATGCACCAAACCATCATCATCAGGATAATCATCTTGGCTCGGGACCACCACCA	aattgaaaaaaaagcttccaacgaaacaacttcagGTGACTCAATGTCCCATCACAGAGGTGAGCATGCACCAAACCATCATCATCAGGATAATCATCTTGGCTCGGGACCACCACCA	lin-41(tn1541tn1663) is a perfect match to the repair ssODN.	exon1seq.F	n2914.R	SphI	688 bp	472, 216 bp	lin-41(tn1541tn1664)	None
lin-41(tn1541tn1665)	lin41_gRNA_14			Exon_1_bx37	CAGGACCTCGTCGGCTTCAAACTGAGATCGACGTGGACGCCAACGACAGCCGAAACGAGCTCAGTATGGGCGGAAGCAGCAGTGAAGgtaacacttgaaaattgaaaaaaaagcttcc	CAGGACCTCGTCGGCTTCAAACTGAGATCGACGTGGACGCCAACGACAGCCGAAACGAGCTCAGTATGGGCGGAAGCAGCAGTGAAGgtaacacttgaaaattgaaaaaaaagcttcc	lin-41(tn1541tn665) is a perfect match to the repair ssODN	bx37.F	bx37.R	SacI	452 bp	286, 166 bp	lin-41(tn1541tn1666)	lin-41(tn1541tn1671) does NOT have the non-synonymous change present in lin-41(tn1541tn1665) (G35R) , but does have the restriction site and all synonymous changes.
lin-41(tn1541tn1668)	lin41_gRNA_14			Exon_1_DAGNELA	CAGGACCTCGTCGGCTTCAAACTGAGATCGACGTGGACGCCAACGACGCCGGAAACGAGCTCGCTATGGGCGGAAGCAGCAGTGAAGgtaacacttgaaaattgaaaaaaaagcttcc	CAGGACCTCGTCGGCTTCAAACTGAGATCGACGTGGACGCCAACGACGCCGGAAACGAGCTCGCTATGGGCGGAAGCAGCAGTGAAGgtaacacttgaaaattgaaaaaaaagcttcc	lin-41(tn1541tn668) is a perfect match to the repair ssODN	bx37.F	bx37.R	SacI	452 bp	286, 166 bp	lin-41(tn1541tn1667)	lin-41(tn1541tn1669) and lin-41(tn1541tn1670) do NOT have the first set of non-synonymous changes found in lin-41(tn1541tn1668)(S34A); they do have the restriction site and the second set of non-synonymous changes (S39A).
lin-41(tn1541tn1684)	lin41_gRNA_17			lin41_exon2_FDEPPS	CATCTTGGCTCGGGACCACCACCACCACAGTTCACTGGCTCACTATTTGACGAACCGCCATCGATGATCCAATCACCACAGCAGCAACCACAGTTCCAGTTCAACACTGGATTCGGACTCGG	CATCTTGGCTCGGGACCACCACCACCACAGTTCACTGGCTCACTATTTGACGAACCGCCATCGATGATCCAATCACCACAGCAGCAACCACAGTTCCAGTTCAACACTGGATTCGGACTCGG	lin-41(tn1541tn1684) is a perfect match to the repair ssODN.	exon1seq.F	n2914.R	ClaI	688 bp	385, 303 bp	lin-41(tn1541tn1683)	lin-41(tn1541tn1685) and lin-41(tn1541tn1686) have the non-synonymous change found in lin-41(tn1541tn1684) (T83E), but only the first 3 (of 5) synonymous changes.
lin-41(tn1541tn1775)	lin41_gRNA_29			lin41_exon6_LAAPMSS	CATTCTGCAACCATAGCTCCACCACGTAATTCCATGTGCTCGACGCCAAGACTGCAGCTTGCTGCACCAATGTCTTCACAATCACAGCAAACTTTTCCAATTCCTTCACCACTTGG	CATTCTGCAACCATAGCTCCACCACGTAATTCCATGTGCTCGACGCCAAGACTGCAGCTTGCTGCACCAATGTCTTCACAATCACAGCAAACTTTTCCAATTCCTTCACCACTTGG	lin-41(tn1541tn1775) is a perfect match to the repair ssODN.	intron5.F	exon7.R	PstI	658 bp	404, 254 bp	lin-41(tn1541tn1776)	None
lin-41(tn1767)	lin41_gRNA_17			lin41_exon2_FDAPPS	CATCTTGGCTCGGGACCACCACCACCACAGTTCACTGGCTCACTATTTGACGCTCCGCCATCGATGATCCAATCACCACAGCAGCAACCACAGTTCCAGTTCAACACTGGATTCGGACTCGG	CATCTTGGCTCGGGACCACCACCACCACAGTTCACTGGCTCACTATTTGACGCTCCGCCATCGATGATCCAATCACCACAGCAGCAACCACAGTTCCAGTTCAACACTGGATTCGGACTCGG	lin-41(tn1767) is a perfect match to the repair ssODN.	exon1seq.F	n2914.R	ClaI	688 bp	385, 303 bp	lin-41(tn1768)	lin-41(tn1769) has the non-synonymous change found in lin-41(tn1767) (T83A), but only the first 3 (of 5) synonymous changes.

## Sheet: PCR primers
lin-41 primer name	lin-41 primer sequence
10F	GGGCCATGTGCCAAGAATAGTTC
4R	gatgcaagaaggatcaagggatc
6F	GACATCATGGTCTCCATTGCAAC
Cdel1.F	ACATGTGTCTGGCGTTGAAA
Cdel1.R	ctggaatgtgtgtgctttgc
exon1seq.F	ATGGCGACCATCGTGCCATG
exon5.R	ATCACTGGAGACGGTGATCC
exon7.R	TGGCTCGAACACGCTGATGA
GFP7215	GGCGATGGCCCTGTCCTTTTA
intron5.F	ggtttcgccgtcaataccta
n2914.F	AAGACTCCTTTCGGTGCTCA
n2914.R	ATCCGACATCAGAGCTCCAC
RING.F	TGAGCATTCACCAAACCATC
tn1487.F	ATTGGCTCATTTGGACTTGG
bx37.F	ATTCAAAGAAACCGCTGCTG
bx37.R	GAGCACCGAAAGGAGTCTTG

## Sheet: GFP_LIN41_proteins
lin-41 allele	lin-41 exons and introns fused	Insertion	Number of LIN-41 amino acids deleted	LIN-41 amino acids deleted	LIN-41 protein domains deleted	Number of amino acids potentially inserted	Predicted GFP::LIN-41 protein sequence #1 (inserted aa)	Predicted GFP::LIN-41 protein sequence #2 (inserted aa)	Estimated molecular mass of GFP::LIN-41
lin-41(tn1541)	none	none	none	none	none	none	MGSPGLQEFDIKLIDTVDLEGAVPVEKMSKGEELFTGVVPILVELDGDVNGHKFSVSGEGEGDATYGKLTLKFICTTGKLPVPWPTLVTTFCYGVQCFSRYPDHMKRHDFFKSAMPEGYVQERTIFFKDDGNYKTRAEVKFEGDTLVNRIELKGIDFKEDGNILGHKLEYNYNSHNVYIMADKQKNGIKVNFKIRHNIEDGSVQLADHYQQNTPIGDGPVLLPDNHYLSTQSALSKDPNEKRDHMVLLEFVTAAGITHGMDELYKCPGDRWSSTGGGRSRENLYFQGAAKFKETAAAKFERQHMDSGGGGMATIVPCSLEKEEGAPSGPRRLQTEIDVDANDSGNELSMGGSSSEGDSMSHHRGEHSPNHHHQDNHLGSGPPPPQFTGSLFDTPPSMIQ…	N/A	159 kDa
lin-41(tn1541tn1562)	Exon 6 and intron 11/12	17 bp	351 aa	GSQPQQQQPMGPIQCQGCESKISFAYCMQCQEALCIHCVQAHQRVRATKQHAFVELQQLMATLMSRAVQPQQAQQYTQNVGGSVRQALGSVGSGDVFFSGHVSGVENDSIGSGESSPRSSSVCGTHDSVIIGICENCPHSVLLCAICVAQHPGKHRVQPLGDIRVAVGEVVNESQLLQWQCEKTGDTIKQIIDGIVTNATTAENEIRAAFDTHVNALEERRKELLKRVETVKNLKLSVLISQAESLQSKQIDLQQAIQTATKLMDSSDCDEMVLRQVFEKLASCQMGNEGTEPNNNILNVLMLACQVNEDDRLKFTAPQDGILLNKARQFGNIESGPCAKNSSIVGDSFKK	B-boxes, BBC	1-5* aa	MGSPGLQEFDIKLIDTVDLEGAVPVEKMSKGEELFTGVVPILVELDGDVNGHKFSVSGEGEGDATYGKLTLKFICTTGKLPVPWPTLVTTFCYGVQCFSRYPDHMKRHDFFKSAMPEGYVQERTIFFKDDGNYKTRAEVKFEGDTLVNRIELKGIDFKEDGNILGHKLEYNYNSHNVYIMADKQKNGIKVNFKIRHNIEDGSVQLADHYQQNTPIGDGPVLLPDNHYLSTQSALSKDPNEKRDHMVLLEFVTAAGITHGMDELYKCPGDRWSSTGGGRSRENLYFQGAAKFKETAAAKFERQHMDSGGGGMATIVPCSLEKEEGAPSGPRRLQTEIDVDANDSGNELSMGGSSSEGDSMSHHRGEHSPNHHHQDNHLGSGPPPPQFTGSLFDTPPSMIQ…	MGSPGLQEFDIKLIDTVDLEGAVPVEKMSKGEELFTGVVPILVELDGDVNGHKFSVSGEGEGDATYGKLTLKFICTTGKLPVPWPTLVTTFCYGVQCFSRYPDHMKRHDFFKSAMPEGYVQERTIFFKDDGNYKTRAEVKFEGDTLVNRIELKGIDFKEDGNILGHKLEYNYNSHNVYIMADKQKNGIKVNFKIRHNIEDGSVQLADHYQQNTPIGDGPVLLPDNHYLSTQSALSKDPNEKRDHMVLLEFVTAAGITHGMDELYKCPGDRWSSTGGGRSRENLYFQGAAKFKETAAAKFERQHMDSGGGGMATIVPCSLEKEEGAPSGPRRLQTEIDVDANDSGNELSMGGSSSEGDSMSHHRGEHSPNHHHQDNHLGSGPPPPQFTGSLFDTPPSMIQ…	121 kDa
lin-41(tn1541tn1571)	Exon 11 and exon 13	0 bp	148 aa	GILLNKARQFGNIESGPCAKNSSIVGDSFKKAIRERQTVIYVQLRDACGDLLSSSIAATQPTSQALLPHQEPHSHLEQAMPTSDVQAFVISPDGSTVEVTMTPRENGIVALSYYPSIEGSYTLNILVKGTPISGCPTTMDIRRGRNYD	IG/Filamin	0 aa	MGSPGLQEFDIKLIDTVDLEGAVPVEKMSKGEELFTGVVPILVELDGDVNGHKFSVSGEGEGDATYGKLTLKFICTTGKLPVPWPTLVTTFCYGVQCFSRYPDHMKRHDFFKSAMPEGYVQERTIFFKDDGNYKTRAEVKFEGDTLVNRIELKGIDFKEDGNILGHKLEYNYNSHNVYIMADKQKNGIKVNFKIRHNIEDGSVQLADHYQQNTPIGDGPVLLPDNHYLSTQSALSKDPNEKRDHMVLLEFVTAAGITHGMDELYKCPGDRWSSTGGGRSRENLYFQGAAKFKETAAAKFERQHMDSGGGGMATIVPCSLEKEEGAPSGPRRLQTEIDVDANDSGNELSMGGSSSEGDSMSHHRGEHSPNHHHQDNHLGSGPPPPQFTGSLFDTPPSMIQ…	N/A	143 kDa
lin-41(tn1541tn1618)	Exon 13 and exon 15	0 bp	310 aa	RGRNYDEIAAKGPILTFGKEGSGDGELCRPWGICVDQRGRVIVADRSNNRVQIFDKDGNFISKFGTSGNRPGQFDRPAGITTNSLNNIVVADKDNHRVQVFDENGMFLLKFGDRGRAVGYFNYPWGVATNSHNAIAVSDTRNHRVQIFTPQGQFVRKCGFDSAYFFKNLDSPRGLCYLPDGQLLITDFNNHRLAVLSPRNMSEMKVYGSEGDGDGMFVRPQGVVIDPEGHILVCDSRNNRVQVFASDDMRFIGSFGLGPVPNSGFQMPQELPAPYSSLGGPFGAPAFSSAPTPLTPSPRQLLDRPTDLAV	NHL 1-5, part of NHL 6	0 aa	MGSPGLQEFDIKLIDTVDLEGAVPVEKMSKGEELFTGVVPILVELDGDVNGHKFSVSGEGEGDATYGKLTLKFICTTGKLPVPWPTLVTTFCYGVQCFSRYPDHMKRHDFFKSAMPEGYVQERTIFFKDDGNYKTRAEVKFEGDTLVNRIELKGIDFKEDGNILGHKLEYNYNSHNVYIMADKQKNGIKVNFKIRHNIEDGSVQLADHYQQNTPIGDGPVLLPDNHYLSTQSALSKDPNEKRDHMVLLEFVTAAGITHGMDELYKCPGDRWSSTGGGRSRENLYFQGAAKFKETAAAKFERQHMDSGGGGMATIVPCSLEKEEGAPSGPRRLQTEIDVDANDSGNELSMGGSSSEGDSMSHHRGEHSPNHHHQDNHLGSGPPPPQFTGSLFDTPPSMIQ…	N/A	125 kDa
lin-41(tn1541tn1620)	Exon 1 and exon 5	0 bp	166 aa	GGSSSEGDSMSHHRGEHSPNHHHQDNHLGSGPPPPQFTGSLFDTPPSMIQSPQQQPQFQFNTGFGLGLPQDSFRCSVCSKSSTIGVLPFVCAHKTCQSCYQMTPSSYDRRACKLCGAVSTATANFTSQMYLSPTLPSPPRGALMSDCSTPTMNNHINSSTPLHQPR	DEG-A, RING, DEG-B1	0 aa	MGSPGLQEFDIKLIDTVDLEGAVPVEKMSKGEELFTGVVPILVELDGDVNGHKFSVSGEGEGDATYGKLTLKFICTTGKLPVPWPTLVTTFCYGVQCFSRYPDHMKRHDFFKSAMPEGYVQERTIFFKDDGNYKTRAEVKFEGDTLVNRIELKGIDFKEDGNILGHKLEYNYNSHNVYIMADKQKNGIKVNFKIRHNIEDGSVQLADHYQQNTPIGDGPVLLPDNHYLSTQSALSKDPNEKRDHMVLLEFVTAAGITHGMDELYKCPGDRWSSTGGGRSRENLYFQGAAKFKETAAAKFERQHMDSGGGGMATIVPCSLEKEEGAPSGPRRLQTEIDVDANDSGNELSMAFSFSLSGMPGSPSPVMGARMPSSAGGLMMRPIGFPDSDSSLTSWSPLQQ…	N/A	141 kDa
lin-41(tn1541tn1622)	Exon 5 and exon 6	0 bp	151 aa	AFSFSLSGMPGSPSPVMGARMPSSAGGLMMRPIGFPDSDSSLTSWSPLQQPSQLSINNLSSIGGHQQQSPMLMQNVFDSLAVNDDTPVFSPLSPTNTSMHMPPSLMASPDVPKHSATIAPPRNSMCSTPRLQLATPMSSQSQQTFPIPSPL	DEG-B2	0 aa	MGSPGLQEFDIKLIDTVDLEGAVPVEKMSKGEELFTGVVPILVELDGDVNGHKFSVSGEGEGDATYGKLTLKFICTTGKLPVPWPTLVTTFCYGVQCFSRYPDHMKRHDFFKSAMPEGYVQERTIFFKDDGNYKTRAEVKFEGDTLVNRIELKGIDFKEDGNILGHKLEYNYNSHNVYIMADKQKNGIKVNFKIRHNIEDGSVQLADHYQQNTPIGDGPVLLPDNHYLSTQSALSKDPNEKRDHMVLLEFVTAAGITHGMDELYKCPGDRWSSTGGGRSRENLYFQGAAKFKETAAAKFERQHMDSGGGGMATIVPCSLEKEEGAPSGPRRLQTEIDVDANDSGNELSMGGSSSEGDSMSHHRGEHSPNHHHQDNHLGSGPPPPQFTGSLFDTPPSMIQ…	N/A	143 kDa
lin-41(tn1541tn1628)	Exon 6 and exon 15	0 bp	772 aa	SQPQQQQPMGPIQCQGCESKISFAYCMQCQEALCIHCVQAHQRVRATKQHAFVELQQLMATLMSRAVQPQQAQQYTQNVGGSVRQALGSVGSGDVFFSGHVSGVENDSIGSGESSPRSSSVCGTHDSVIIGICENCPHSVLLCAICVAQHPGKHRVQPLGDIRVAVGEVVNESQLLQWQCEKTGDTIKQIIDGIVTNATTAENEIRAAFDTHVNALEERRKELLKRVETVKNLKLSVLISQAESLQSKQIDLQQAIQTATKLMDSSDCDEMVLRQVFEKLASCQMGNEGTEPNNNILNVLMLACQVNEDDRLKFTAPQDGILLNKARQFGNIESGPCAKNSSIVGDSFKKAIRERQTVIYVQLRDACGDLLSSSIAATQPTSQALLPHQEPHSHLEQAM…	B-boxes, BBC, Ig/filamin, NHL 1-5, part of NHL 6	0 aa	MGSPGLQEFDIKLIDTVDLEGAVPVEKMSKGEELFTGVVPILVELDGDVNGHKFSVSGEGEGDATYGKLTLKFICTTGKLPVPWPTLVTTFCYGVQCFSRYPDHMKRHDFFKSAMPEGYVQERTIFFKDDGNYKTRAEVKFEGDTLVNRIELKGIDFKEDGNILGHKLEYNYNSHNVYIMADKQKNGIKVNFKIRHNIEDGSVQLADHYQQNTPIGDGPVLLPDNHYLSTQSALSKDPNEKRDHMVLLEFVTAAGITHGMDELYKCPGDRWSSTGGGRSRENLYFQGAAKFKETAAAKFERQHMDSGGGGMATIVPCSLEKEEGAPSGPRRLQTEIDVDANDSGNELSMGGSSSEGDSMSHHRGEHSPNHHHQDNHLGSGPPPPQFTGSLFDTPPSMIQ…	N/A	75 kDa
lin-41(tn1541tn1630)	Exon 2 and exon 4	0 bp	49 aa	RCSVCSKSSTIGVLPFVCAHKTCQSCYQMTPSSYDRRACKLCGAVSTAT	RING	0 aa	MGSPGLQEFDIKLIDTVDLEGAVPVEKMSKGEELFTGVVPILVELDGDVNGHKFSVSGEGEGDATYGKLTLKFICTTGKLPVPWPTLVTTFCYGVQCFSRYPDHMKRHDFFKSAMPEGYVQERTIFFKDDGNYKTRAEVKFEGDTLVNRIELKGIDFKEDGNILGHKLEYNYNSHNVYIMADKQKNGIKVNFKIRHNIEDGSVQLADHYQQNTPIGDGPVLLPDNHYLSTQSALSKDPNEKRDHMVLLEFVTAAGITHGMDELYKCPGDRWSSTGGGRSRENLYFQGAAKFKETAAAKFERQHMDSGGGGMATIVPCSLEKEEGAPSGPRRLQTEIDVDANDSGNELSMGGSSSEGDSMSHHRGEHSPNHHHQDNHLGSGPPPPQFTGSLFDTPPSMIQ…	N/A	154 kDa
lin-41(tn1541tn1635)	Exon 4 and exon 5	0 bp	44 aa	ANFTSQMYLSPTLPSPPRGALMSDCSTPTMNNHINSSTPLHQPR	DEG-B1	0 aa	MGSPGLQEFDIKLIDTVDLEGAVPVEKMSKGEELFTGVVPILVELDGDVNGHKFSVSGEGEGDATYGKLTLKFICTTGKLPVPWPTLVTTFCYGVQCFSRYPDHMKRHDFFKSAMPEGYVQERTIFFKDDGNYKTRAEVKFEGDTLVNRIELKGIDFKEDGNILGHKLEYNYNSHNVYIMADKQKNGIKVNFKIRHNIEDGSVQLADHYQQNTPIGDGPVLLPDNHYLSTQSALSKDPNEKRDHMVLLEFVTAAGITHGMDELYKCPGDRWSSTGGGRSRENLYFQGAAKFKETAAAKFERQHMDSGGGGMATIVPCSLEKEEGAPSGPRRLQTEIDVDANDSGNELSMGGSSSEGDSMSHHRGEHSPNHHHQDNHLGSGPPPPQFTGSLFDTPPSMIQ…	N/A	154 kDa
lin-41(tn1541tn1638)	Exon 1 and exon 2	0 bp	73 aa	GGSSSEGDSMSHHRGEHSPNHHHQDNHLGSGPPPPQFTGSLFDTPPSMIQSPQQQPQFQFNTGFGLGLPQDSF	DEG-A	0 aa	MGSPGLQEFDIKLIDTVDLEGAVPVEKMSKGEELFTGVVPILVELDGDVNGHKFSVSGEGEGDATYGKLTLKFICTTGKLPVPWPTLVTTFCYGVQCFSRYPDHMKRHDFFKSAMPEGYVQERTIFFKDDGNYKTRAEVKFEGDTLVNRIELKGIDFKEDGNILGHKLEYNYNSHNVYIMADKQKNGIKVNFKIRHNIEDGSVQLADHYQQNTPIGDGPVLLPDNHYLSTQSALSKDPNEKRDHMVLLEFVTAAGITHGMDELYKCPGDRWSSTGGGRSRENLYFQGAAKFKETAAAKFERQHMDSGGGGMATIVPCSLEKEEGAPSGPRRLQTEIDVDANDSGNELSMRCSVCSKSSTIGVLPFVCAHKTCQSCYQMTPSSYDRRACKLCGAVSTATA…	N/A	151 kDa
lin-41(tn1541tn1643)	Exon 1 and exon 6	0 bp	317 aa	GGSSSEGDSMSHHRGEHSPNHHHQDNHLGSGPPPPQFTGSLFDTPPSMIQSPQQQPQFQFNTGFGLGLPQDSFRCSVCSKSSTIGVLPFVCAHKTCQSCYQMTPSSYDRRACKLCGAVSTATANFTSQMYLSPTLPSPPRGALMSDCSTPTMNNHINSSTPLHQPRAFSFSLSGMPGSPSPVMGARMPSSAGGLMMRPIGFPDSDSSLTSWSPLQQPSQLSINNLSSIGGHQQQSPMLMQNVFDSLAVNDDTPVFSPLSPTNTSMHMPPSLMASPDVPKHSATIAPPRNSMCSTPRLQLATPMSSQSQQTFPIPSPL	DEG-A, RING, DEG-B1, DEG-B2	0 aa	MGSPGLQEFDIKLIDTVDLEGAVPVEKMSKGEELFTGVVPILVELDGDVNGHKFSVSGEGEGDATYGKLTLKFICTTGKLPVPWPTLVTTFCYGVQCFSRYPDHMKRHDFFKSAMPEGYVQERTIFFKDDGNYKTRAEVKFEGDTLVNRIELKGIDFKEDGNILGHKLEYNYNSHNVYIMADKQKNGIKVNFKIRHNIEDGSVQLADHYQQNTPIGDGPVLLPDNHYLSTQSALSKDPNEKRDHMVLLEFVTAAGITHGMDELYKCPGDRWSSTGGGRSRENLYFQGAAKFKETAAAKFERQHMDSGGGGMATIVPCSLEKEEGAPSGPRRLQTEIDVDANDSGNELSMGSQPQQQQPMGPIQCQGCESKISFAYCMQCQEALCIHCVQAHQRVRATKQ…	N/A	125 kDa
* Amino acids will be added if either of the two possible in-frame splice donors present in the 17-bp insertion are spliced to the intron 11 splice acceptor site.

## Sheet: oma2_alleles
Allele	gRNA plasmid	gRNA sequence	5' Homology arm Forward primer	5' Homology arm Reverse primer	3' Homology arm Forward primer	3' Homology arm Reverse primer	gBlock 3' homology arm sequence (lin-41 sequence in red)	Plasmid repair template	oma-2 sequence after repair and excision (lin-41 sequence in red)	Predicted protein (LIN-41 amino acids in red)	Allele generated by
oma-2(cp145)	pDD223	ctgcactactaacgaaataA	ACGTTGTAAAACGACGGCCAGTCGCCGGCAcagctagattttggtcagaca	GGCCATGTTGTCCTCCTCTCCCTTGGAGACGGACATtatttcgttagtagtgcaggggaaattggttagtgattaggcgtg	CGTGATTACAAGGATGACGATGACAAGAGAATGGATATGCTCAAGGAAAATGT	TCACACAGGAAACAGCTATGACCATGTTATGATGGACGAAGCTCCTC	n.a.	pDD271	cagctagattttggtcagacagtgttgttgaaaattttttagtcgagaaaatctagttattcgctgtttatgagttactttttcagacaattacacaatttccatgcttgctaaaaaaaaattattagttacagtaacctttaaaggcgcagcagcggggagtgcacatctcaaacgagtgtgaccgtagtcattggtgaaaattggcaacattttcttgcaagttttttgactttgattcaaccataaatttcagacttaattctaaacttaagtattaaaaaataattatttgatcttatttagcgcgcattgccgccaaacattgactttttgtttcgaaattttgggacagagatggttttcttcagttttcttttgttcaacaacatttggttc…	MSVSKGEEDNMASLPATHELHIFGSINGVDFDMVGQGTGNPNDGYEELNLKSTKGDLQFSPWILVPHIGYGFHQYLPYPDGMSPFQAAMVDGSGYQVHRTMQFEDGASLTVNYRYTYEGSHIKGEAQVKGTGFPADGPVMTNSLTAADWCRSKKTYPNDKTIISTFKWSYTTGNGKRYRSTARTTYTFAKPMAANYLKNQPMYVFRKTELKHSKTELNFKEWQKAFTDVMGMDELYKENLYFQSGKGAGSDYKDDDDKRDYKDDDDKRDYKDDDDKRMDMLKENVIQNNEARTESSVEPSHPDMMETVPEEQQKPISHIDDLLSETANLMAVKEQLLKEIAENEHIHSMQMRALQNLPQEAILPLQYHADPRRRHRMQKPESYKTVICQAWLESKTCAF…	Dickinson et al. 2015
oma-2(tn1760)	pDD223	ctgcactactaacgaaataA	ACGTTGTAAAACGACGGCCAGTCGCCGGCAcagctagattttggtcagaca	GGCCATGTTGTCCTCCTCTCCCTTGGAGACGGACATtatttcgttagtagtgcaggggaaattggttagtgattaggcgtg	n.a	n.a.	CGTGATTACAAGGATGACGATGACAAGAGAGGCGGAAGCAGCAGTGAAGGTGACTCAATGTCCCACCATCGCGGTGAGCATTCACCAAACCATCATCATCAGGATAATCATCTTGGCTCGGGACCACCACCACCACAGTTCACTGGCTCACTATTTGACACTCCACCGTCAATGATTCAGTCACCACAGCAGCAACCACAGTTCCAGTTCAACACTGGATTCGGACTCGGACTCCCGCAAGACTCCTTTATGGATATGCTCAAGGAAAATGTTATCCAGAATAATGAgtgagccacttttatcatagtttctcaattttaattttcttttttaagGGCTCGTACAGAGTCGAGTGTTGAACCATCGCATCCCGATATGATGGAGACTGTTCCGGAAGAA…	pCS557	cagctagattttggtcagacagtgttgttgaaaattttttagtcgagaaaatctagttattcgctgtttatgagttactttttcagacaattacacaatttccatgcttgctaaaaaaaaattattagttacagtaacctttaaaggcgcagcagcggggagtgcacatctcaaacgagtgtgaccgtagtcattggtgaaaattggcaacattttcttgcaagttttttgactttgattcaaccataaatttcagacttaattctaaacttaagtattaaaaaataattatttgatcttatttagcgcgcattgccgccaaacattgactttttgtttcgaaattttgggacagagatggttttcttcagttttcttttgttcaacaacatttggttc…	MSVSKGEEDNMASLPATHELHIFGSINGVDFDMVGQGTGNPNDGYEELNLKSTKGDLQFSPWILVPHIGYGFHQYLPYPDGMSPFQAAMVDGSGYQVHRTMQFEDGASLTVNYRYTYEGSHIKGEAQVKGTGFPADGPVMTNSLTAADWCRSKKTYPNDKTIISTFKWSYTTGNGKRYRSTARTTYTFAKPMAANYLKNQPMYVFRKTELKHSKTELNFKEWQKAFTDVMGMDELYKENLYFQSGKGAGSDYKDDDDKRDYKDDDDKRDYKDDDDKRGGSSSEGDSMSHHRGEHSPNHHHQDNHLGSGPPPPQFTGSLFDTPPSMIQSPQQQPQFQFNTGFGLGLPQDSFMDMLKENVIQNNEARTESSVEPSHPDMMETVPEEQQKPISHIDDLLSET…	C. Spike, this work
oma-2(tn1764)	pDD223	ctgcactactaacgaaataA	ACGTTGTAAAACGACGGCCAGTCGCCGGCAcagctagattttggtcagaca	GGCCATGTTGTCCTCCTCTCCCTTGGAGACGGACATtatttcgttagtagtgcaggggaaattggttagtgattaggcgtg	n.a.	n.a.	CGTGATTACAAGGATGACGATGACAAGAGAGGCGGAAGCAGCAGTGAAGGTGACTCAATGTCCCACCATCGCGGTGAGCATTCACCAAACCATCATCATCAGGATAATCATCTTGGCTCGGGACCACCACCACCACAGTTCACTGGCTCACTATTTGACACTCCACCGTCAATGATTCAGTCACCACAGCAGCAACCACAGTTCCAGTTCAACACTGGATTCGGACTCGGACTCCCGCAAGACTCCTTTGCCAACTTTACATCGCAGATGTACCTGTCTCCGACGCTTCCATCACCGCCACGTGGAGCTCTGATGTCGGATTGTTCGACACCAACGATGAATAATCACATTAATTCATCAACTCCACTTCATCAACCTCGTGCATTCTCATTCTCACTC…	pCS561	cagctagattttggtcagacagtgttgttgaaaattttttagtcgagaaaatctagttattcgctgtttatgagttactttttcagacaattacacaatttccatgcttgctaaaaaaaaattattagttacagtaacctttaaaggcgcagcagcggggagtgcacatctcaaacgagtgtgaccgtagtcattggtgaaaattggcaacattttcttgcaagttttttgactttgattcaaccataaatttcagacttaattctaaacttaagtattaaaaaataattatttgatcttatttagcgcgcattgccgccaaacattgactttttgtttcgaaattttgggacagagatggttttcttcagttttcttttgttcaacaacatttggttc…	MSVSKGEEDNMASLPATHELHIFGSINGVDFDMVGQGTGNPNDGYEELNLKSTKGDLQFSPWILVPHIGYGFHQYLPYPDGMSPFQAAMVDGSGYQVHRTMQFEDGASLTVNYRYTYEGSHIKGEAQVKGTGFPADGPVMTNSLTAADWCRSKKTYPNDKTIISTFKWSYTTGNGKRYRSTARTTYTFAKPMAANYLKNQPMYVFRKTELKHSKTELNFKEWQKAFTDVMGMDELYKENLYFQSGKGAGSDYKDDDDKRDYKDDDDKRDYKDDDDKRGGSSSEGDSMSHHRGEHSPNHHHQDNHLGSGPPPPQFTGSLFDTPPSMIQSPQQQPQFQFNTGFGLGLPQDSFANFTSQMYLSPTLPSPPRGALMSDCSTPTMNNHINSSTPLHQPRAFSFS…	C. Spike, this work
